# Supplementary material for: Predictive Importance of Social Contacts on U.S. Veteran Suicide Safety Plans
Source: Atypon-hosted journal article supplement (doi:10.1176/appi.ps.202100699), 2022-08-30
Supplement: appi.ps.202100699.ds001.pdf [file appi.ps.202100699.ds001.pdf]

Supplementary Table 1

*Associations between demographics and safety plan contact variables utilizing logistic regressions.*

|                             |                                           | Distraction Contact |            |          | Help contact |            |          |
|-----------------------------|-------------------------------------------|---------------------|------------|----------|--------------|------------|----------|
|                             |                                           | OR                  | 95% CI     | <i>p</i> | OR           | 95 % CI    | <i>p</i> |
| Age                         | 19-29 years old (Ref)                     | -                   | -          | .108     | -            | -          | .182     |
|                             | 30-39 years old                           | 1.29                | 0.91-1.85  | .157     | 0.96         | 0.59-1.56  | .862     |
|                             | 40-49 years old                           | 0.89                | 0.60-1.30  | .537     | 0.99         | 0.57-1.74  | .984     |
|                             | 50-59 years old                           | 1.08                | 0.71-1.64  | .732     | 0.62         | 0.37-1.06  | .082     |
|                             | 60+ years old                             | 0.80                | 0.55-1.16  | .235     | 0.66         | 0.40-1.09  | .102     |
| Gender                      | Men (Ref)                                 | -                   | -          | -        | -            | -          | -        |
|                             | Women                                     | 1.93                | 1.37-2.74  | <.001    | 1.69         | 1.07-2.67  | .026     |
| Race-ethnicity <sup>a</sup> | White (Ref)                               | -                   | -          | .027     | -            | -          | .016     |
|                             | Black or African American                 | 1.07                | 0.76-1.50  | .709     | 1.58         | 0.99-2.53  | .054     |
|                             | Asian                                     | 0.78                | 0.52-1.15  | .204     | 1.78         | 0.97-3.27  | .064     |
|                             | American Indian or Alaskan Native         | 0.66                | 0.20-2.14  | .490     | 0.54         | 0.15-1.98  | .357     |
|                             | Native Hawaiian or other Pacific Islander | 3.53                | 1.08-11.57 | .038     | 3.04         | 0.72-12.79 | .130     |
|                             | Multiracial                               | 0.57                | 0.28-1.16  | .124     | 0.79         | 0.32-1.95  | .609     |
|                             | Latinx                                    | 1.30                | 0.91-1.85  | .144     | 2.10         | 1.26-3.47  | .004     |
|                             | Not Latinx, refused or unknown race       | 3.97                | 0.52-30.30 | .184     | 0.45         | 0.14-1.41  | .169     |
|                             | Latinx, non-white or multiracial          | 3.57                | 0.84-15.20 | .085     | -            | -          | .998     |
| Psychiatric diagnosis       | No Psychiatric Diagnosis (Ref)            | -                   | -          | .115     | -            | -          | .850     |
|                             | Schizophrenia or Schizoaffective          | 1.50                | 0.87-2.60  | .146     | 0.85         | 0.41-1.78  | .671     |
|                             | Other Psychotic Disorders                 | 0.87                | 0.40-1.87  | .741     | 1.23         | 0.35-4.41  | .746     |
|                             | Affective Disorders                       | 1.47                | 1.01-2.12  | .042     | 0.92         | 0.54-1.58  | .766     |
|                             | PTSD                                      | 1.62                | 1.04-2.53  | .034     | 1.04         | 0.55-1.95  | .911     |
|                             | SUD                                       | 0.88                | 0.48-1.59  | .662     | 0.60         | 0.27-1.34  | .210     |
|                             | Other Psychiatric Disorders               | 1.52                | 0.73-3.15  | .264     | 0.78         | 0.31-1.97  | .596     |

*Note.* Ref = reference group. Help contact and Latinx, non-white or multiracial *n* = 0.

<sup>a</sup> *n* = 25 refused or unknown race-ethnicity.
